# Supplementary material
Source: Springer Nature journal article supplement (https://www.springermedizin.de/resource/supplementary/12913_2007_498_MOESM1_ESM.pdf/9534878)
Supplement: MOESM1 [file 9534878]

**Table 2: Patient and physician opinion of quality indicators for choosing hospitals**

Patient and physician ratings of the relevance<sup>1</sup>, understandability and suitability<sup>2</sup> of hospital quality indicators to choose or refer to a hospital (N = 50 patients, 50 physicians); indicators are ranked according to the mean ratings of relevance by patients

| Indicator                                      | Patients |                                 |                         | Physicians |                                 |                 |
|------------------------------------------------|----------|---------------------------------|-------------------------|------------|---------------------------------|-----------------|
|                                                | Rank     | Relevance<br>mean – SD - median | Understand-<br>able (%) | Rank       | Relevance<br>mean - SD - median | Suitable<br>(%) |
| Qualification of doctors                       | 1        | 1.47 - 0.77- 1                  | 86                      | 6          | 1.76 - 1.02 - 2                 | 84              |
| Kindness of staff                              | 2        | 1.54 - 0.65 - 1                 | 100                     | 7          | 1.82 - 1.08 – 1.5               | 92              |
| Patient satisfaction                           | 3        | 1.60 - 0.70 – 1.5               | 100                     | 5          | 1.74 - 1.12 - 1                 | 90              |
| Range of technical equipment                   | 4        | 1.61 - 0.77 - 1                 | 94                      | 8          | 2.08 - 1.18 – 2*                | 84              |
| Qualification of nurses                        | 5        | 1.76 - 0.86 - 2                 | 92                      | 10         | 2.14 - 1.26 - 2                 | 76              |
| 24-hours-availability of technical equipment   | 6        | 1.79 - 0.94 - 2                 | 90                      | 2          | 1.70 - 0.93 - 1                 | 88              |
| Volume of specified surgical procedures        | 7        | 1.83 - 0.84 - 2                 | 98                      | 1          | 1.58 - 0.79 - 1                 | 100             |
| Specialist departments range of services       | 8        | 1.86 - 0.89 - 2                 | 88                      | 4          | 1.72 - 0.95 - 2                 | 88              |
| Medical services and special offers            | 9        | 1.91 - 0.83 - 2                 | 86                      | 9          | 2.14 - 1.05 - 2                 | 88              |
| Range of therapeutic facilities                | 10       | 1.93 - 0.72 - 2                 | 92                      | 3          | 1.72 - 1.01 – 1.5               | 86              |
| Recommendation by relatives or physicians      | 11       | 1.96 - 0.96 - 2                 | 100                     | 14         | 2.62 - 1.35 – 2*                | 72              |
| Specialist outpatient department               | 12       | 2.19 - 1.09 - 2                 | 86                      | 11         | 2.20 - 1.09 – 2                 | 92              |
| Participation in external quality assurance    | 13       | 2.23 - 1.22 - 2                 | 64                      | 19         | 3.18 - 1.56 – 3*                | 66              |
| Volume of specified out-patient operations     | 14       | 2.24 - 1.18 - 2                 | 96                      | 12         | 2.48 - 1.23 – 2                 | 78              |
| Hospital's number of specialist departments    | 15       | 2.24 - 1.26 - 2                 | 100                     | 17         | 2.94 - 1.30 – 3*                | 64              |
| Outpatient treatment facilities                | 16       | 2.30- 1.28 - 2                  | 92                      | 15         | 2.72 - 1.26 – 2                 | 60              |
| Results of external quality assurance          | 17       | 2.31 - 1.23 - 2                 | 60                      | 18         | 3.12 - 1.52 – 3*                | 60              |
| Distance to place of living                    | 18       | 2.49 - 1.12 - 2                 | 98                      | 13         | 2.54 - 1.18 – 2                 | 82              |
| Professional training for doctors              | 19       | 2.61 - 1.40 - 3                 | 74                      | 16         | 2.80 - 1.41 – 3                 | 58              |
| Hospital operates an outpatient department     | 20       | 2.75 - 1.29 - 3                 | 48                      | 20         | 3.26 - 1.59 – 3                 | 58              |
| Participation in Disease Management Programmes | 21       | 2.88 - 1.17 - 2                 | 34                      | 28         | 4.58 - 1.40 – 5*                | 24              |
| Academic teaching hospital                     | 22       | 2.90 - 1.39 - 3                 | 84                      | 23         | 3.46 - 1.47 – 3                 | 66              |
| Realization of minimum volume standards        | 23       | 3.00 - 1.28 - 3                 | 34                      | 21         | 3.44 - 1.57 – 3                 | 44              |
| Hospital's total number of inpatient cases     | 24       | 3.12 - 1.41 - 3                 | 98                      | 22         | 3.44 - 1.25 – 3                 | 52              |
| Hospital regularly visited or referred to      | 25       | 3.18 - 1.50 - 3                 | 86                      | 27         | 4.12 - 1.41 – 4*                | 34              |
| Hospital's total number of beds                | 26       | 3.22 - 1.35 - 3                 | 100                     | 26         | 3.82 - 1.30 – 4*                | 40              |
| Hospital's total number of outpatient cases    | 27       | 3.41 - 1.22 - 3                 | 92                      | 25         | 3.80 - 1.39 – 3.5               | 36              |
| Certified to treat insured accidents           | 28       | 3.60 - 1,27 - 3                 | 40                      | 24         | 3.70 - 1.43 – 4                 | 46              |
| Hospital owner                                 | 29       | 3.63 - 1.46 - 4                 | 88                      | 29         | 4.82 - 1.41 – 5*                | 8               |

<sup>1</sup>: relevance rating: 1 to 6; 1 = highly relevant; 6 = completely irrelevant; table shows mean, standard deviation (SD) and median

<sup>2</sup>: understandability: % of patients rating the indicator as “understandable”; suitability: % of physicians rating the indicator as “suitable”

\*: differences between the patient and physician ratings of relevance significant (p<.05, T-test)
